# Supplementary material for: Quantitative assessment of energy transfer in upconverting nanoparticles grafted with organic dyes
Source: Royal Society of Chemistry journal article supplement (doi:10.1039/c6nr09706e), 2017-01-01
Supplement: c6nr09706e1.pdf [file c6nr09706e1.pdf]

## Supporting information for “Quantitative assessment of energy transfer in upconverting nanoparticles grafted with organic dyes”

Oleksii Dukhno<sup>1\*</sup>, Frédéric Przybilla<sup>1</sup>, Mayeul Collot<sup>1</sup>, Andrey Klymchenko<sup>1</sup>, Vasyl Pivovarenko<sup>2</sup>, Markus Buchner<sup>3</sup>, Verena Muhr<sup>3</sup>, Thomas Hirsch<sup>3</sup>, and Yves Mély<sup>1\*</sup>

1) Laboratory of Biophotonics and Pharmacology, UMR 7213 CNRS, University of Strasbourg, 67000 Strasbourg, France

2) Faculty of Chemistry, National Taras Shevchenko University of Kyiv, 01033 Kyiv, Ukraine

3) Institute of Analytical Chemistry, Chemo- and Biosensors, University of Regensburg, 93040 Regensburg, Germany

### Contents:

1. Scheme of UCNP upconversion mechanism.
2. XRD data for raw UCNPs.
3. Synthesis and spectra of Rhodamine-NH<sub>2</sub>.
4. Synthesis of the PMA amphiphilic polymer.
5. Polymer coating of UCNPs and calculation of dye quantity per particle.
6. Characterization of the UCNP-PMA-RhB by Dynamic Light Scattering (DLS)
7. Emission spectra of the dye-grafted UCNPs
8. Emission decays of the dye-grafted UCNPs.
9. References.

## 1. Scheme of UCNP upconversion mechanism

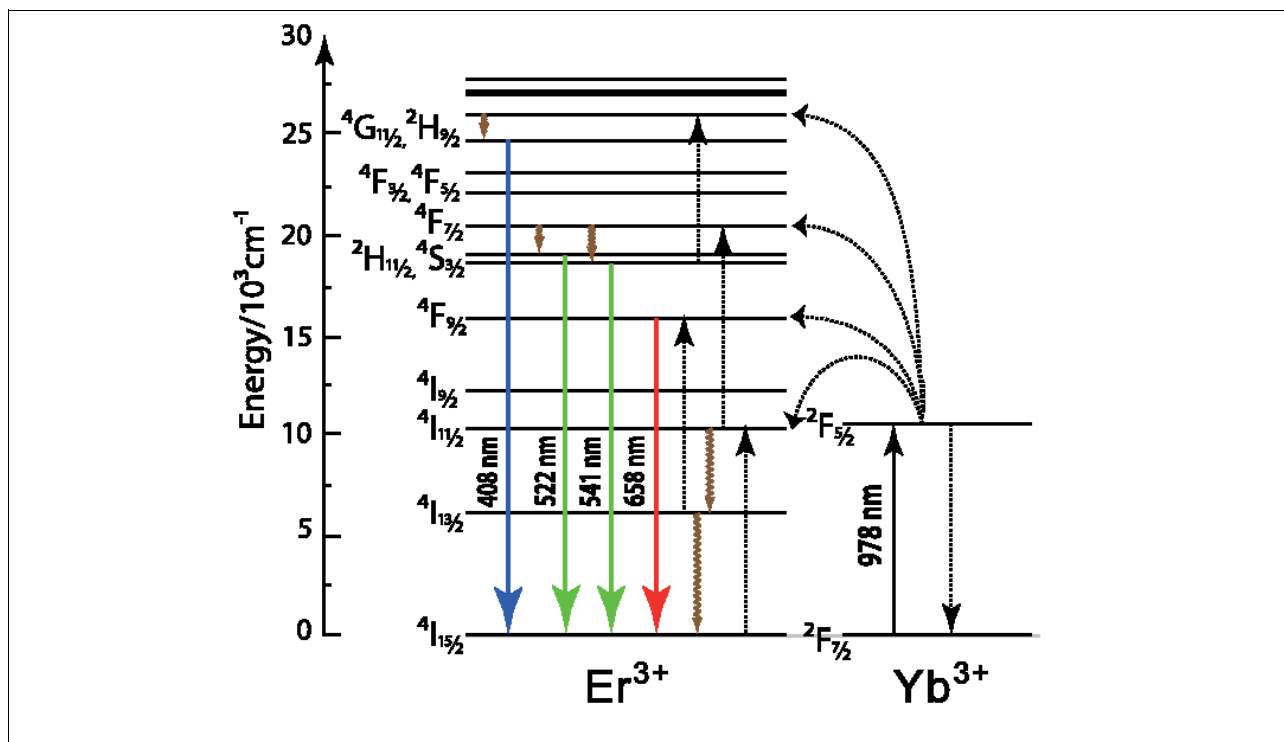

Fig. S1. Simplified upconversion mechanism in Yb-Er UCNPs. Reprinted from Haase and Schafer, 2015.<sup>1</sup>

## 2. XRD data for raw UCNPs

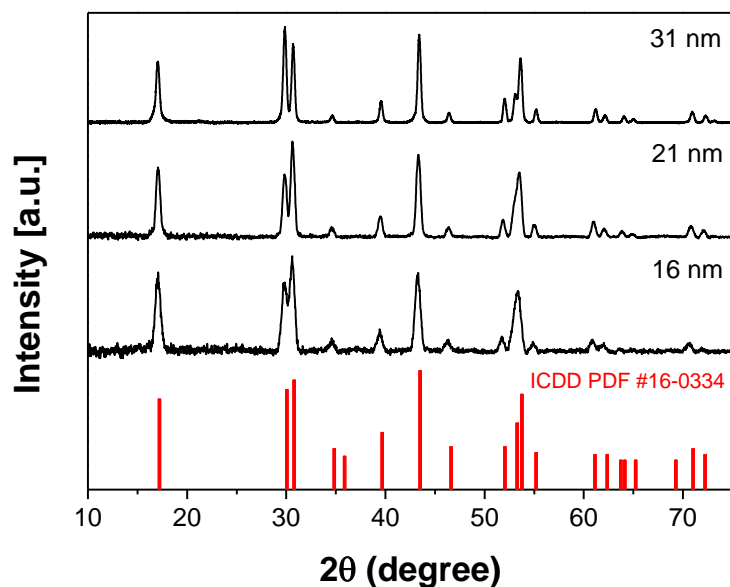

Fig. S2: X-ray diffraction patterns of  $\text{NaYF}_4$  (20% Yb, 2% Er, 0-20% Gd) nanocrystals with decreasing size from 31 nm to 16 nm (top to bottom) and the corresponding standard pattern of hexagonal phase  $\text{NaYF}_4$  (red, ICDD PDF #16-0334).

### 3. Synthesis and spectra of Rhodamine-NH<sub>2</sub>

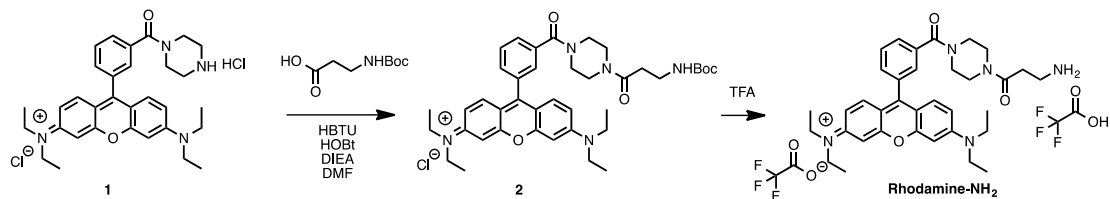

*Fig. S3. Scheme of synthesis of Rhodamine-NH<sub>2</sub>.*

**1** was synthesized according to a reported procedure.<sup>2</sup>

**Synthesis of 2.** To a solution of **1** (210 mg, 0.360 mmol) in DMF (5 mL) was added N-boc-β-Alanine (72 mg, 0.360 mmol, 1 eq), HOBt (58 mg, 0.360 mmol, 1 eq) and HBTU (145 mg, 0.360 mmol, 1 eq). The solution was stirred under argon and DIEA (188 μL, 1.080 mmol, 3 eq) was added. The mixture was allowed to stir overnight under argon. The solvents were evaporated and the product was extracted with DCM, then washed with water before being dried over MgSO<sub>4</sub>. The solution was filtered and evaporated. The crude was purified by column chromatography on silica gel (DCM/MeOH : 94/6) to give 250 mg of **2** as dark pink foam (yield= 96%). R<sub>f</sub>=0.42 (DCM/MeOH : 96/4). <sup>1</sup>H-NMR (400 MHz, CDCl<sub>3</sub>): 7.60 (m, 2H, H Ar), 7.46 (m, 1H, H Ar), 7.24-7.13 (m, 3H, H Ar), 6.95-6.80 (m, 2H, H Ar), 6.72-6.66 (m, 2H, H Ar), 5.20 (m, 1H, NH), 3.59-3.49 (m, 8H, 4 CH<sub>2</sub>), 3.40-3.25 (m, 10H, 5 CH<sub>2</sub>), 2.46 (m, 2H, CH<sub>2</sub>), 1.34-1.21 (m, 21H, CH<sub>3</sub> Boc, 4 CH<sub>3</sub>). <sup>13</sup>C-NMR (100 MHz, CDCl<sub>3</sub>): 170.7 (CO), 170.3 (CO), 167.7 (CO), 162.5 (C Ar), 157.6 (C Ar), 155.8 (C Ar), 155.6 (C Ar), 135.0 (C Ar), 131.9 (C Ar), 130.9 (C Ar), 130.2 (C Ar), 130.0 (C Ar), 127.4 (C Ar), 114.3 (C Ar), 114.0 (C Ar), 113.7 (C Ar), 96.4, 46.0 (CH<sub>2</sub> Et), 45.1-44.8 (multiple peaks), 41.6-40.8 (multiple peaks), 38.5, 36.4-36.2, 33.3, 31.3, 28.4 (CH<sub>3</sub> Boc), 12.5 (CH<sub>3</sub> Et). HRMS (ES<sup>+</sup>), calcd for C<sub>40</sub>H<sub>52</sub>N<sub>5</sub>O<sub>5</sub> [M]<sup>+</sup> 682.3963, found 682.3960.

**Synthesis of Rhodamine-NH<sub>2</sub>.** To a solution of **2** (250 mg, 0.348 mmol) in DCM (5 mL) was added TFA (4 mL), the solution was sonicated for 20 s and the solvents were evaporated. The crude was then dissolved in a minimum of DCM and the solution was poured in stirring Et<sub>2</sub>O. The solution was filtered to obtain 195 mg of Rhodamine-NH<sub>2</sub> as a deep red solid (yield = 69%). R<sub>f</sub>=0.15 (DCM/MeOH : 95/5). The purity was checked by <sup>1</sup>H-NMR and LC-HRMS. <sup>1</sup>H-NMR (400 MHz, DMSO-d<sub>6</sub>): 7.76-7.72 (m, 6H, H Ar, NH<sub>3</sub><sup>+</sup>), 7.54 (s, 1H, H Ar), 7.18-7.10 (m, 4H, H Ar), 6.96 (s, 2H, H Ar), 3.66 (q, 8H, CH<sub>2</sub> Et), 3.39 (m, 12H, CH<sub>2</sub> pip, CH<sub>2</sub> β-ala), 1.24 (t, 12H, CH<sub>3</sub> Et). HRMS (ES<sup>+</sup>), calcd for C<sub>35</sub>H<sub>44</sub>N<sub>5</sub>O<sub>3</sub> [M+H]<sup>+</sup> 582.3439, found 582.3434.



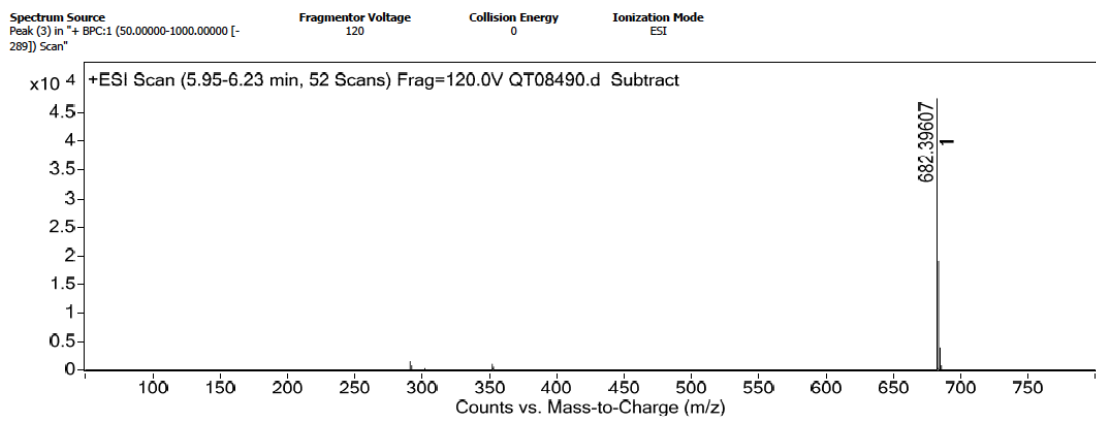

*Fig. S6. HRMS spectrum of 2*

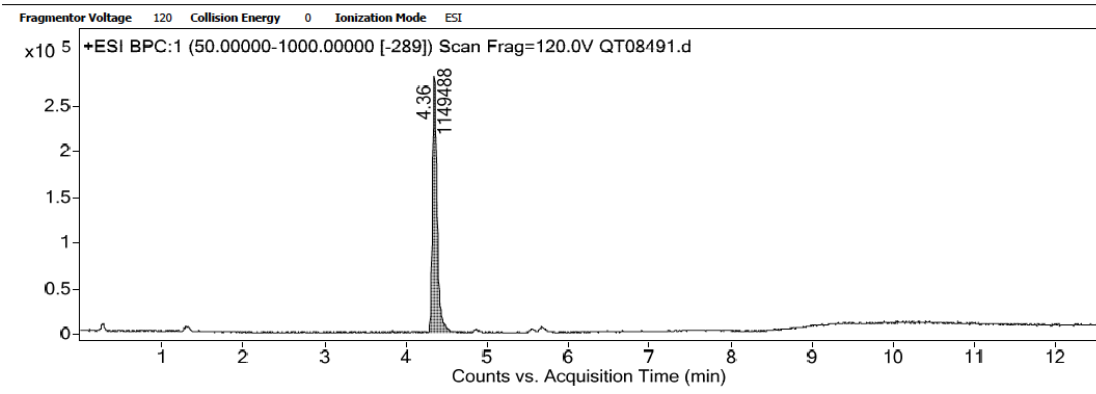

*Fig. S7. Chromatogram of Rhodamine-NH<sub>2</sub> (ACN 0.1% formic acid / Water 0.1% formic acid ; C-18 column)*

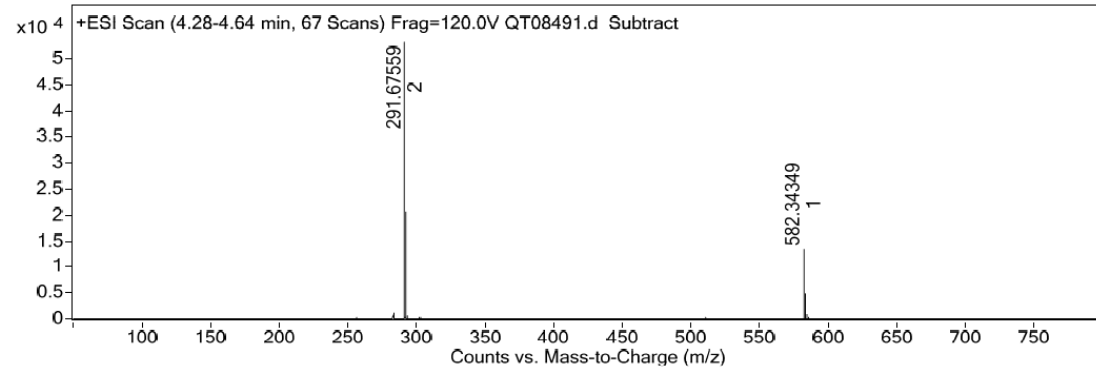

*Fig. S8. HRMS spectrum of Rhodamine-NH<sub>2</sub>*

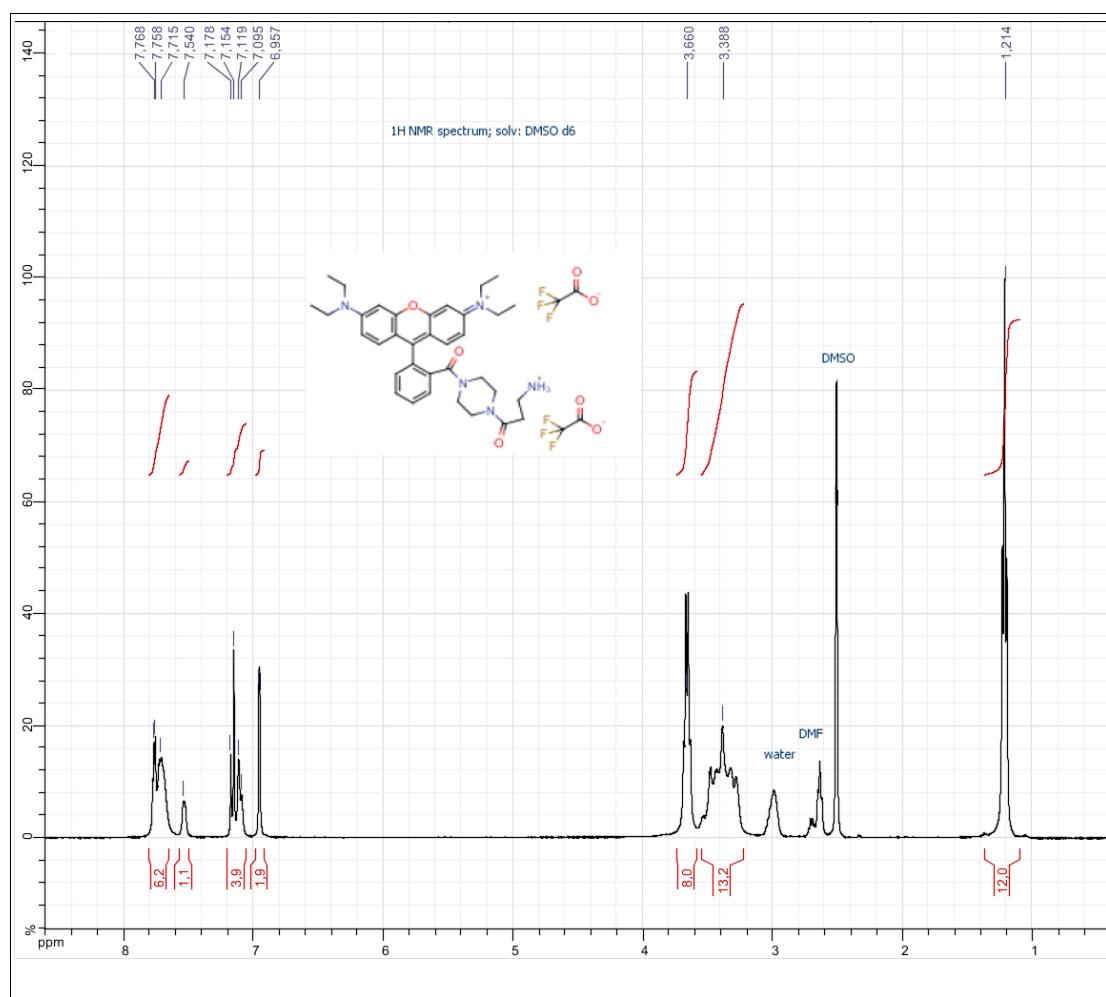

Fig. S9. <sup>1</sup>H NMR spectrum of Rhodamine-NH<sub>2</sub> (DMSO-d<sub>6</sub>)

#### 4. Synthesis of the PMA amphiphilic polymer

In a 10 mL flask with a septum and flushed with argon, 18 mg dodecylamine (97 μmol, 0.75eq) were dissolved in 2 mL anhydrous DMF under magnetic stirring. Diisopropylethylamine (67 μL, 390 μmol, 3eq) was added. 1 mg of piperidyl-beta-alanine-coupled Rhodamine B (1.3 μmol, 0.01 eq) was added. The solution was allowed to stir for 10 min, then 20 mg of poly(isobutylene-alt-maleic anhydride) were added in one portion (130 μmol, 1 eq monomer, avg MW 6000). The vessel was purged with argon a second time, and the reaction mass was stirred at room temperature. After 30 min, a drop of water (approx. 100 eq) was added. The reaction mass was evaporated, redissolved in dichloromethane and purified on LH20 size-exclusion chromatography column (eluent: dichloromethane-methanol 1:1 v/v). Combined elutes were evaporated, and the residue was redissolved in 2.6 mL spectral grade chloroform, corresponding to a theoretical 0.05 M concentration (assuming quantitative yield). This solution was used as a stock for subsequent coating of UCNPs.

#### 5. Polymer coating of UCNPs and calculation of dye quantity per particle

We used a modified version of the protocol from Wilhelm et al., 2015.<sup>3</sup> 0.33 mL of UCNPs with 20.6 nm diameter (5 mg/mL) in cyclohexane were mixed with 0.42 mL 0.05 M PMA solution, sonicated for 1 min at room temperature, and evaporated. The residue was dissolved in 0.75 mL spectral grade chloroform and sonicated for 1 min at room temperature. Then, 1 mL 0.01 M NaOH were added. The mixture was vortexed for 30 s and slowly evaporated on rotavap (high speed of rotation and low vacuum are recommended to avoid bumping), until only aqueous phase remained. Obtained phase was filtered through a Millex GP syringe filter (0.22 μm pore size). The filter was

washed once with 1 mL 0.01 M NaOH. Obtained filtrates were combined.

The quantity of polymer stock solution required for the coating process was calculated using:

$$V_{\text{polymersolution}} = R_p \pi \frac{\omega_{\text{UCNP}}}{\rho V_{\text{UCNP}}} d_{\text{eff}}^2 \frac{1}{c_{\text{polymer}}}$$

where  $R_p$  is the number of polymer, expressed in monomers, applied per  $\text{nm}^2$  of UCNP surface (100 in case of UCNP coated with oleic acid, which is about 5 times in excess compared to the tight fatty chain packing on surface),  $\omega_{\text{UCNP}}$  is the mass concentration of UCNPs (e.g. mg/mL),  $\rho$  is the density of UCNPs ( $4.21 \cdot 10^{-21} \text{ g/nm}^3$ ),  $V$  is the volume of UCNP in  $\text{nm}^3$ ,  $d_{\text{eff}}$  is the effective diameter of UCNP, which includes the thickness of the oleic acid layer (e.g. for a 20.6 nm diameter the effective diameter is 21.7 nm, because of two 0.55 nm thick layers of oleic acid).

The number of surface dyes per particle can be calculated by:

$$N = \pi(d + 2l)^2 * C_{f.ch.} * P$$

where  $d$  is the diameter of the particle (nm),  $l$  is the thickness of the polymer-oleic acid layer (nm),  $C_{f.ch.}$  is the number of fatty chains per  $\text{nm}^2$  in the tightly packed monolayer, and  $P$  is the percentage of dyes per monomer.

The calculated number of dyes per particle is provided in following table (thickness of oleic acid layer assumed to be 1.1 nm, packing density of fatty chains in monolayer is assumed to be  $5 \text{ nm}^{-2}$ ). It should be noted that this calculation represents the quantity of dyes bound specifically on the surface of UCNPs. Due to excess of polymer being used to ensure proper UCNP coating, some polymer micelles are formed in dispersion. Dyes in polymer micelles are not considered surface-bound to UCNPs and are not accounted for in the calculation.

| <u>particle diameter, nm</u> | <u>dye percentage per monomer</u>                                        |              |             |             |
|------------------------------|--------------------------------------------------------------------------|--------------|-------------|-------------|
|                              | <u>quantity of surface-bound dyes per particle after coating process</u> |              |             |             |
|                              | <b>0%</b>                                                                | <b>0.33%</b> | <b>1.5%</b> | <b>6.6%</b> |
| <b>16</b>                    | 0                                                                        | 17           | 78          | 343         |
| <b>21</b>                    | 0                                                                        | 27           | 123         | 539         |
| <b>31</b>                    | 0                                                                        | 54           | 244         | 1075        |

  

| <u>particle diameter, nm</u> | <u>dye:Er<sup>3+</sup> ratio</u> |              |             |             |
|------------------------------|----------------------------------|--------------|-------------|-------------|
|                              | <b>0%</b>                        | <b>0.33%</b> | <b>1.5%</b> | <b>6.6%</b> |
| <b>16</b>                    | 0                                | 0.043        | 0.196       | 0.861       |
| <b>21</b>                    | 0                                | 0.035        | 0.157       | 0.692       |
| <b>31</b>                    | 0                                | 0.020        | 0.093       | 0.409       |

Table S1. Calculated dye quantities and dye-Er<sup>3+</sup> ratios per particle.

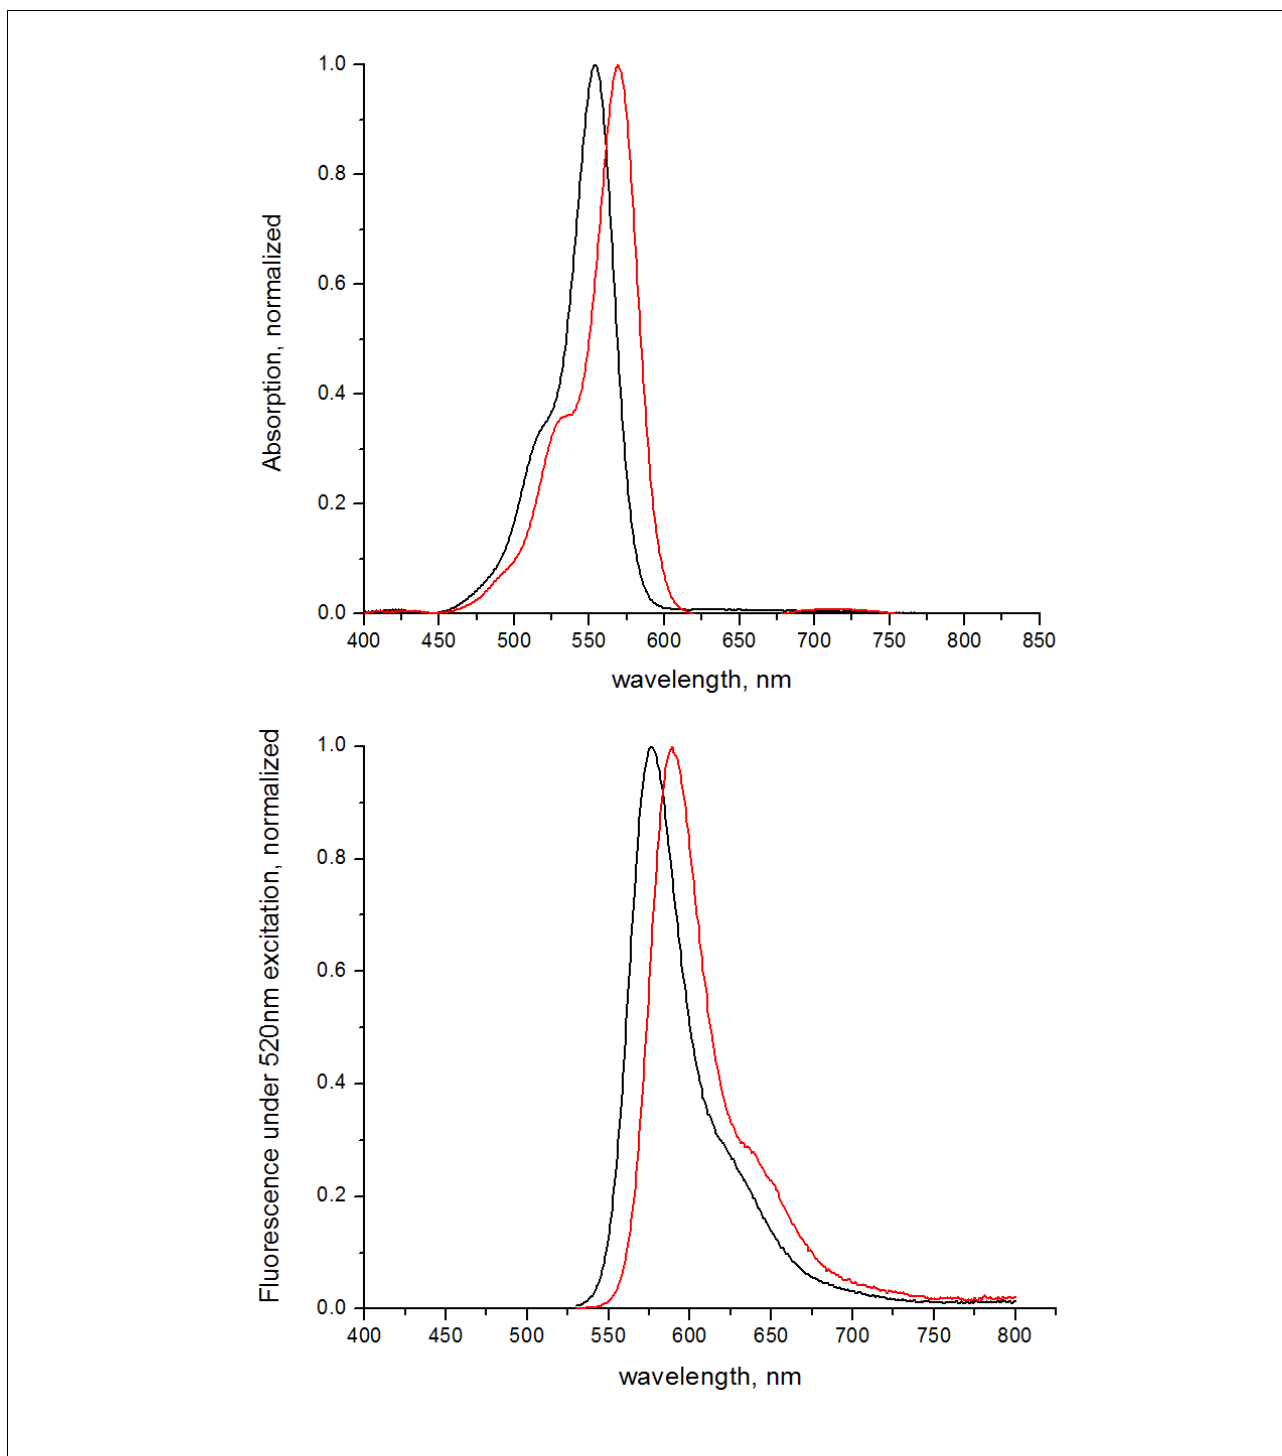

*Fig. S10. Normalized absorption and emission spectra of Rhodamine B (black) and UCNP-PMA-RhB conjugates in water (red). Absorption spectra were measured on a Cary 4000 spectrometer. Fluorescence spectra were recorded with a 520 nm excitation wavelength on a Fluoromax-4 spectrofluorimeter.*

## **6. Characterization of the UCNP-PMA-RhB by Dynamic Light Scattering (DLS)**

Size distributions have been obtained by “volume” treatment of the correlation curves. This type of treatment was chosen due to overestimation of the percentage of larger particles by “intensity” treatment. All curves and polydispersity indexes (PdI) were calculated as an average of three consecutive measurements. Measurements were done at 298 K. Each curve in figures is an average of 3 measurements of 3 samples of one type. PdI values are given as a mean  $\pm$  1 standard deviation. Samples were diluted 10 $\times$  in mQ water.



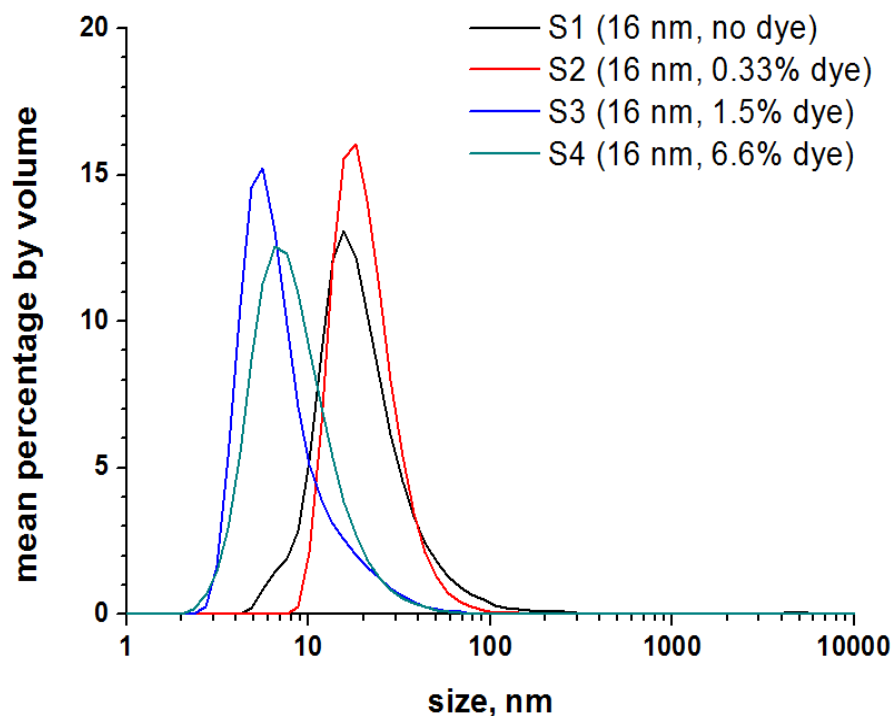

*Fig. S11. Mean size distributions for samples S1-S4. PDI are  $0.369 \pm 0.047$ ,  $0.341 \pm 0.020$ ,  $0.428 \pm 0.046$ , and  $0.432 \pm 0.033$ , respectively.*

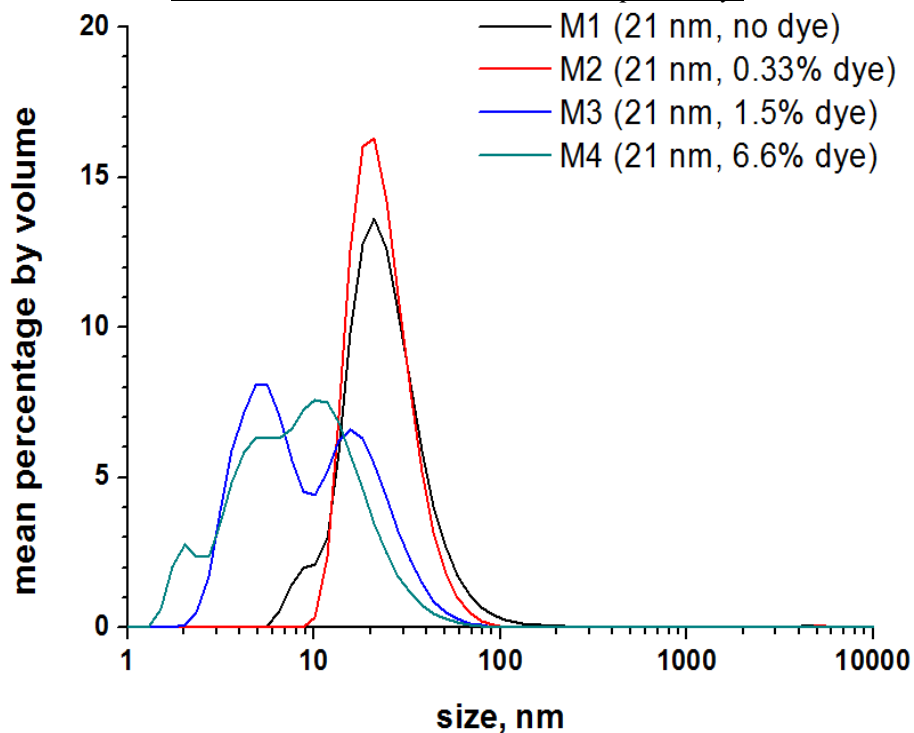

*Fig. S12. Mean size distributions for samples M1-M4. PDI are  $0.296 \pm 0.037$ ,  $0.191 \pm 0.021$ ,  $0.260 \pm 0.048$ , and  $0.302 \pm 0.034$ , respectively.*

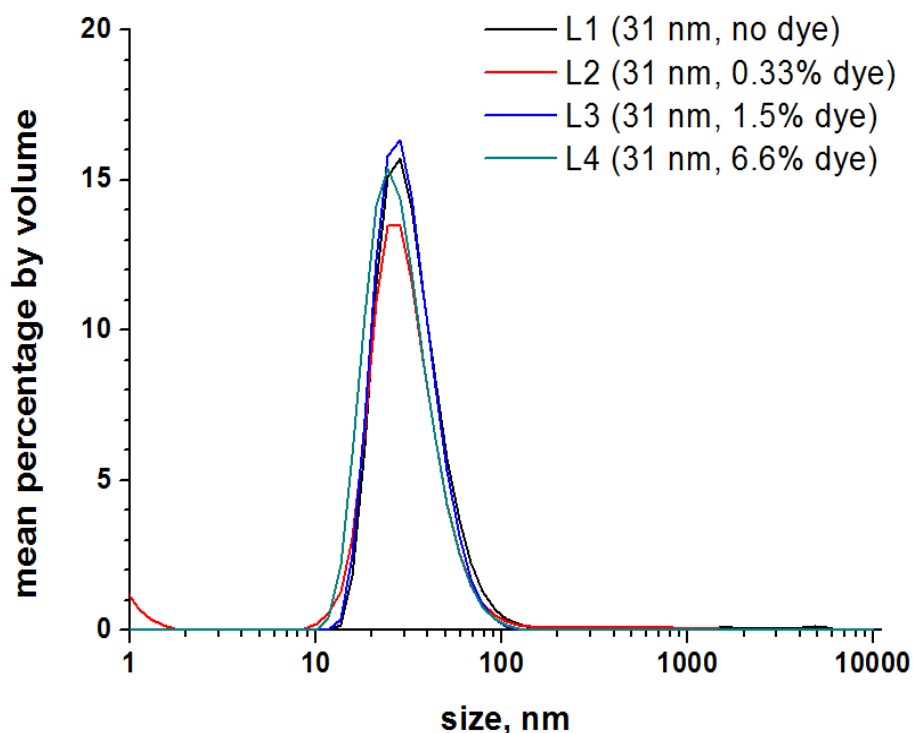

*Fig. S13. Mean size distributions for samples L1-L4.  $PdI$  are  $0.230\pm0.038$ ,  $0.199\pm0.088$ ,  $0.149\pm0.027$ , and  $0.186\pm0.032$ , respectively.*

### 7. Emission spectra of the dye-grafted UCNPs

All spectra were measured in samples diluted  $10\times$  in milliQ water, with continuous 980 nm excitation. The position of the beam inside the cuvette was chosen to be as close to the detector as possible, to mitigate any possible inner filter effects (see Figure S20 for details). Each spectrum represents an average of 480 spectra, each with signal accumulation of 5 s. After averaging, the spectra are smoothed (adjacent averaging, 5 points, corresponds to  $\sim 1$  nm spectral resolution), normalized by the intensity at 664 nm (to minimize dye crosstalk), and the bands are integrated to obtain the intensities used in equation 1 (510-565 nm for the green band and 655-680 nm for the red band).

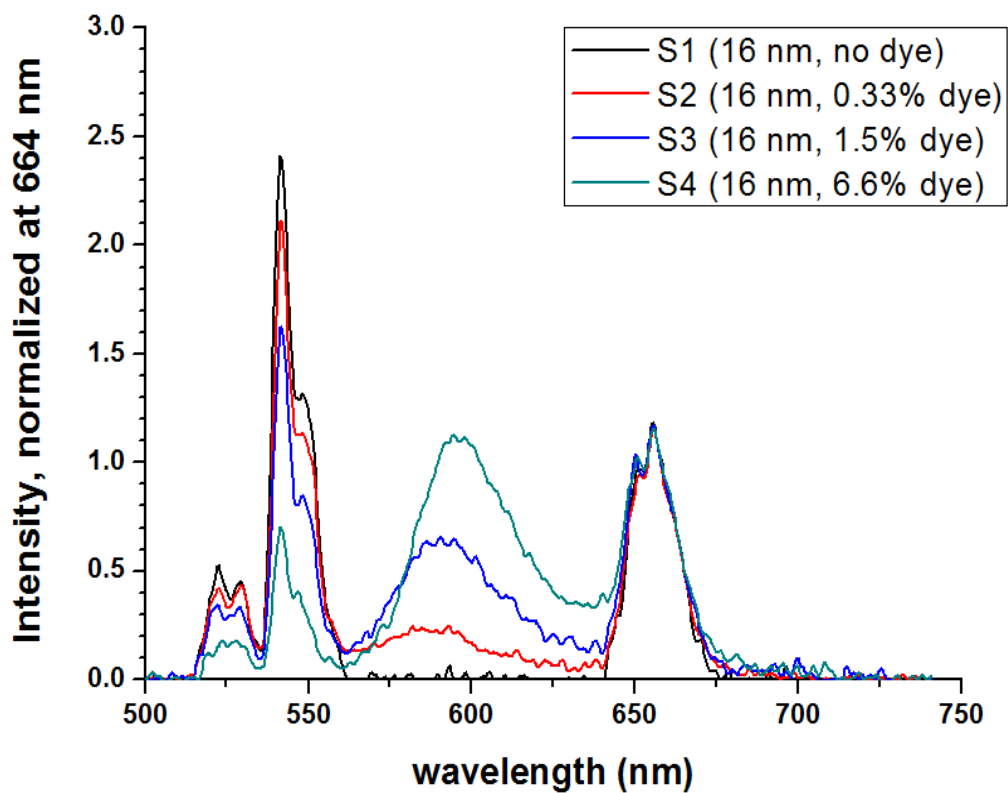

*Fig. S14. Mean normalized luminescence spectra of samples S1-S4. Excitation wavelength 980 nm.*

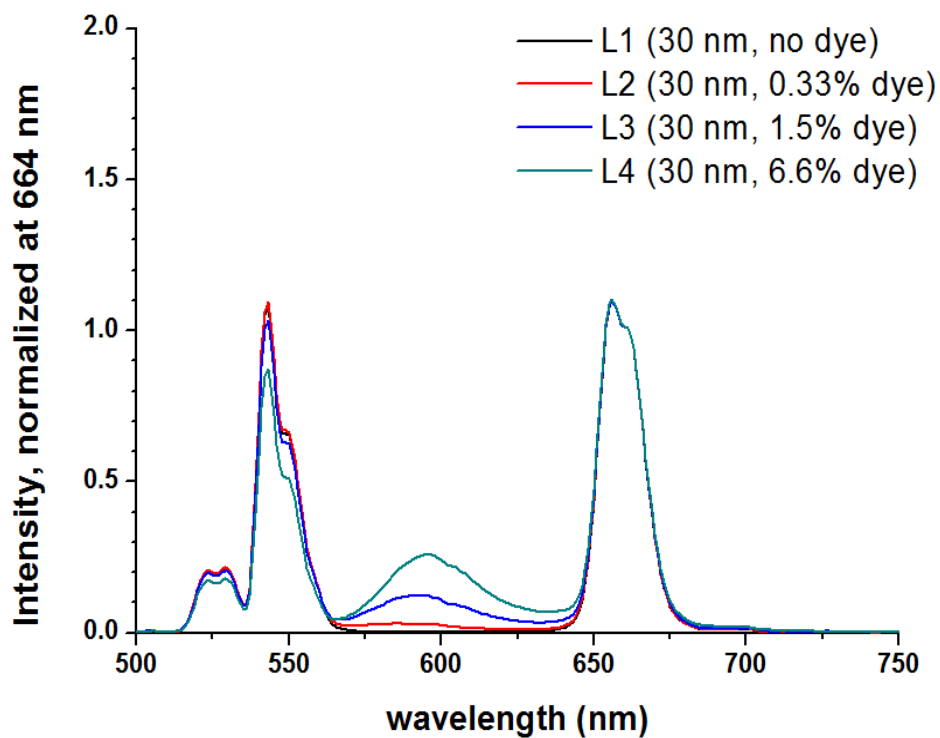

*Fig. S15. Mean normalized luminescence spectra of samples L1-L4. Excitation wavelength 980 nm.*

## 8. Emission decays of the dye-grafted UCNPs

All decays were collected to obtain total 2M photons per decay curve (including the truncated rising part). For each sample 5 curves have been collected and independently fitted. Values provided in the table are mean  $\pm$  1 standard deviation over 15 decays in total (5 curves x 3 sample repeats).

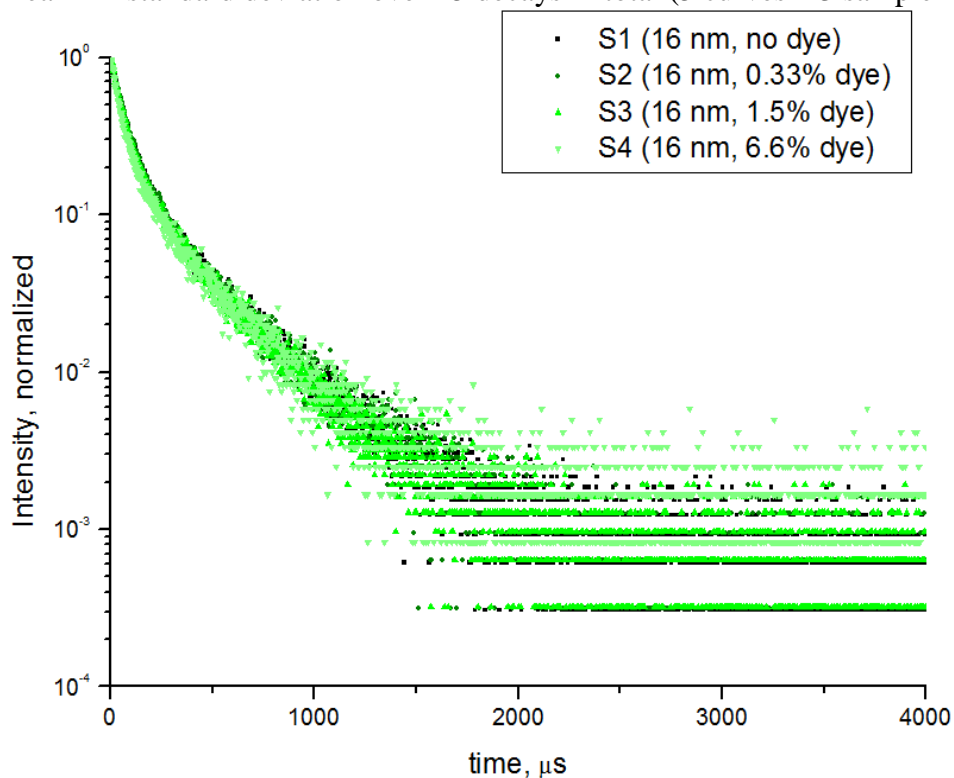

*Fig. S16. Examples of normalized decay curves of one batch of samples S1-S4 at 542 nm emission. Excitation wavelength 980 nm.*

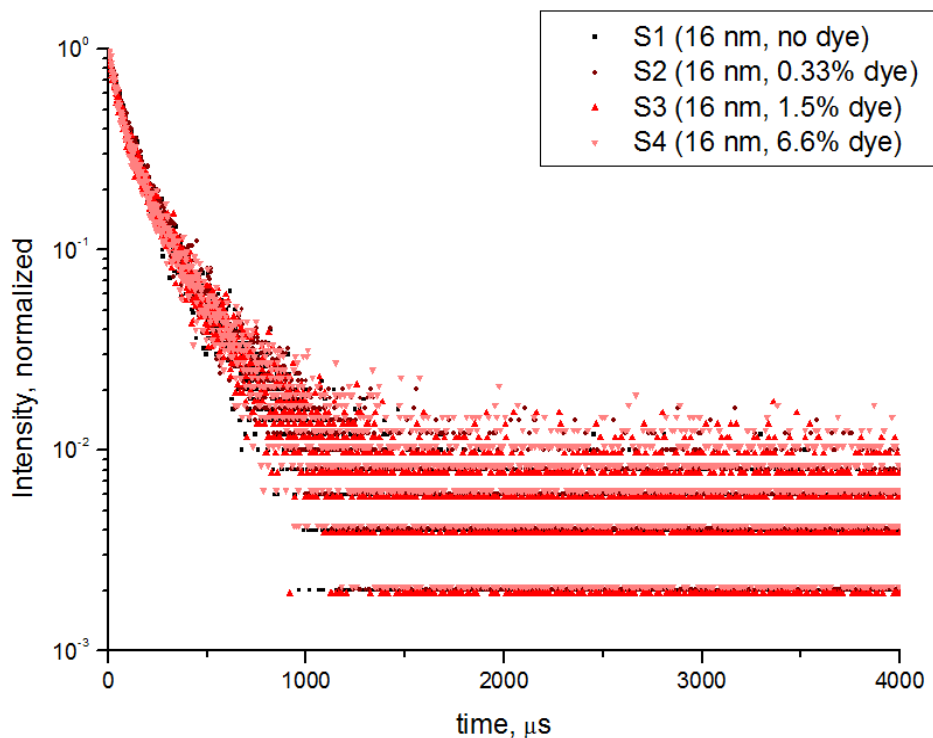

*Fig. S17. Examples of normalized decay curves of one batch of samples S1-S4 at 542 nm emission. Excitation wavelength 980 nm.*

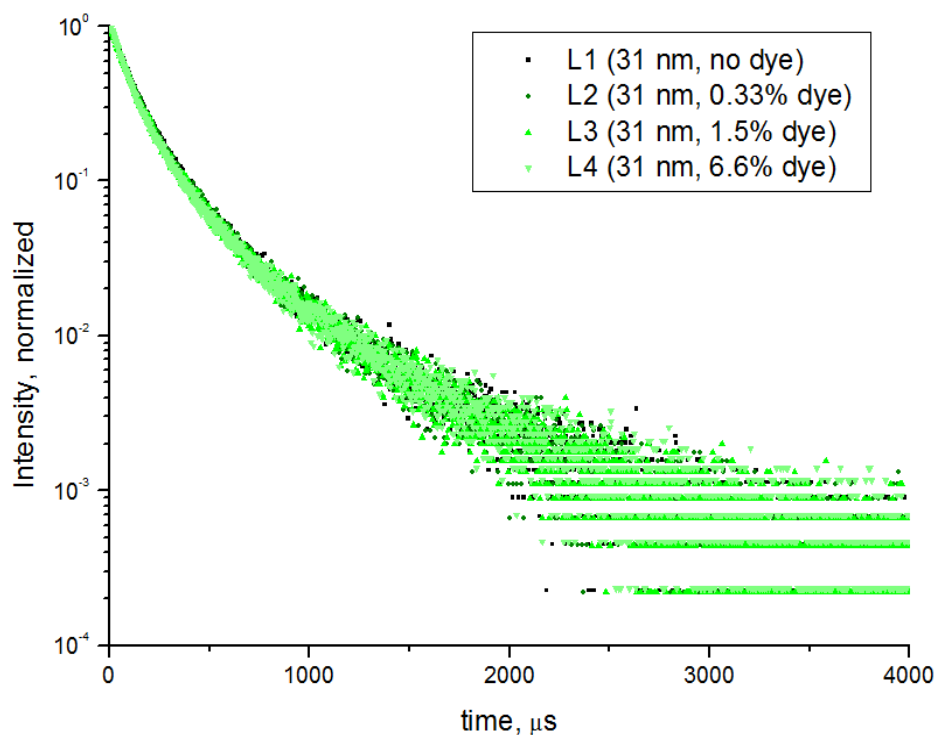

*Fig. S18. Examples of normalized decay curves of one batch of samples L1-L4 at 542 nm emission.  
Excitation wavelength 980 nm.*

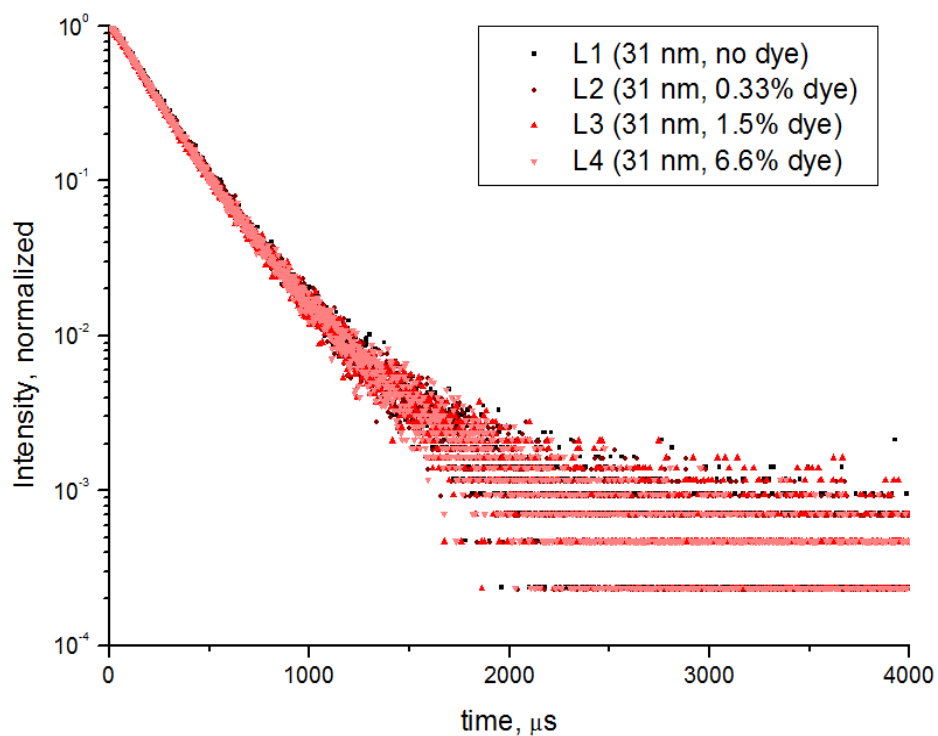

*Fig. S19. Examples of normalized decay curves of one batch of samples L1-L4 at 662 nm emission.  
Excitation wavelength 980 nm.*

| <b>16 nm diameter</b> |                  |                  |                  |                  |
|-----------------------|------------------|------------------|------------------|------------------|
|                       | <i>S1, 542nm</i> | <i>S2, 542nm</i> | <i>S3, 542nm</i> | <i>S4, 542nm</i> |
| <i>A1</i>             | 0.68 ± 0.01      | 0.62 ± 0.08      | 0.65 ± 0.06      | 0.68 ± 0.05      |
| <i>t1</i>             | 60 ± 6           | 51 ± 6           | 49 ± 5           | 42 ± 3           |
| <i>A2</i>             | 0.20 ± 0.02      | 0.25 ± 0.06      | 0.22 ± 0.05      | 0.20 ± 0.04      |
| <i>t2</i>             | 149 ± 8          | 122 ± 22         | 130 ± 29         | 134 ± 41         |
| <i>A3</i>             | 0.12 ± 0.01      | 0.14 ± 0.03      | 0.13 ± 0.02      | 0.12 ± 0.04      |
| <i>t3</i>             | 364 ± 35         | 331 ± 26         | 329 ± 30         | 348 ± 69         |
|                       | <i>S1, 662nm</i> | <i>S2, 662nm</i> | <i>S3, 662nm</i> | <i>S4, 662nm</i> |
| <i>A1</i>             | 0.57 ± 0.10      | 0.53 ± 0.04      | 0.53 ± 0.05      | 0.57 ± 0.06      |
| <i>t1</i>             | 76 ± 14          | 65 ± 9           | 66 ± 11          | 53 ± 9           |
| <i>A2</i>             | 0.43 ± 0.10      | 0.47 ± 0.04      | 0.47 ± 0.05      | 0.43 ± 0.06      |
| <i>t2</i>             | 236 ± 13         | 223 ± 15         | 228 ± 14         | 224 ± 11         |
| <i>spectral ratio</i> | 2.06 ± 0.49      | 1.88 ± 0.21      | 1.37 ± 0.15      | 0.58 ± 0.12      |
| <b>21 nm diameter</b> |                  |                  |                  |                  |
|                       | <i>M1, 542nm</i> | <i>M2, 542nm</i> | <i>M3, 542nm</i> | <i>M4, 542nm</i> |
| <i>A1</i>             | 0.51 ± 0.08      | 0.55 ± 0.06      | 0.49 ± 0.06      | 0.59 ± 0.03      |
| <i>t1</i>             | 58 ± 6           | 58 ± 4           | 50 ± 4           | 46 ± 2           |
| <i>A2</i>             | 0.31 ± 0.08      | 0.26 ± 0.06      | 0.31 ± 0.06      | 0.24 ± 0.03      |
| <i>t2</i>             | 127 ± 13         | 131 ± 12         | 114 ± 10         | 123 ± 7          |
| <i>A3</i>             | 0.18 ± 0.01      | 0.19 ± 0.01      | 0.20 ± 0.01      | 0.18 ± 0.01      |
| <i>t3</i>             | 345 ± 6          | 329 ± 9          | 321 ± 6          | 332 ± 11         |
|                       | <i>M1, 662nm</i> | <i>M2, 662nm</i> | <i>M3, 662nm</i> | <i>M4, 662nm</i> |
| <i>A1</i>             | 0.87 ± 0.02      | 0.86 ± 0.03      | 0.85 ± 0.03      | 0.88 ± 0.02      |
| <i>t1</i>             | 108 ± 4          | 103 ± 8          | 95 ± 7           | 92 ± 8           |
| <i>A2</i>             | 0.13 ± 0.02      | 0.14 ± 0.03      | 0.15 ± 0.03      | 0.12 ± 0.03      |
| <i>t2</i>             | 302 ± 16         | 297 ± 24         | 278 ± 23         | 297 ± 24         |
| <i>spectral ratio</i> | 2.35 ± 0.16      | 2.04 ± 0.63      | 1.95 ± 0.57      | 1.49 ± 0.15      |
| <b>30 nm diameter</b> |                  |                  |                  |                  |
|                       | <i>L1, 542nm</i> | <i>L2, 542nm</i> | <i>L3, 542nm</i> | <i>L4, 542nm</i> |
| <i>A1</i>             | 0.56 ± 0.03      | 0.56 ± 0.03      | 0.58 ± 0.03      | 0.61 ± 0.03      |
| <i>t1</i>             | 86 ± 4           | 85 ± 4           | 83 ± 3           | 77 ± 3           |
| <i>A2</i>             | 0.37 ± 0.03      | 0.37 ± 0.02      | 0.35 ± 0.03      | 0.33 ± 0.02      |
| <i>t2</i>             | 195 ± 9          | 192 ± 11         | 193 ± 10         | 195 ± 10         |
| <i>A3</i>             | 0.07 ± 0.01      | 0.07 ± 0.01      | 0.07 ± 0.01      | 0.07 ± 0.01      |
| <i>t3</i>             | 551 ± 19         | 543 ± 26         | 539 ± 21         | 549 ± 15         |
|                       | <i>L1, 662nm</i> | <i>L2, 662nm</i> | <i>L3, 662nm</i> | <i>L4, 662nm</i> |
| <i>A1</i>             | 0.91 ± 0.01      | 0.91 ± 0.01      | 0.88 ± 0.02      | 0.87 ± 0.02      |
| <i>t1</i>             | 198 ± 5          | 196 ± 9          | 191 ± 5          | 188 ± 6          |
| <i>A2</i>             | 0.09 ± 0.01      | 0.09 ± 0.01      | 0.12 ± 0.02      | 0.13 ± 0.02      |
| <i>t2</i>             | 398 ± 19         | 396 ± 23         | 371 ± 14         | 369 ± 16         |
| <i>spectral ratio</i> | 1.10 ± 0.03      | 1.12 ± 0.07      | 1.09 ± 0.03      | 0.88 ± 0.07      |

Table S2. Bi- and triexponential decay fit parameters for all samples. Decay lifetimes are given in  $\mu\text{s}$ . Preexponential parameters are unitless. All values are given as a mean  $\pm 1$  standard deviation. The choice of the number of components was determined by maximum entropy method. All samples were measured diluted 10x in milliQ water, with 8 kW/cm<sup>2</sup> continuous-wave 980 nm excitation.

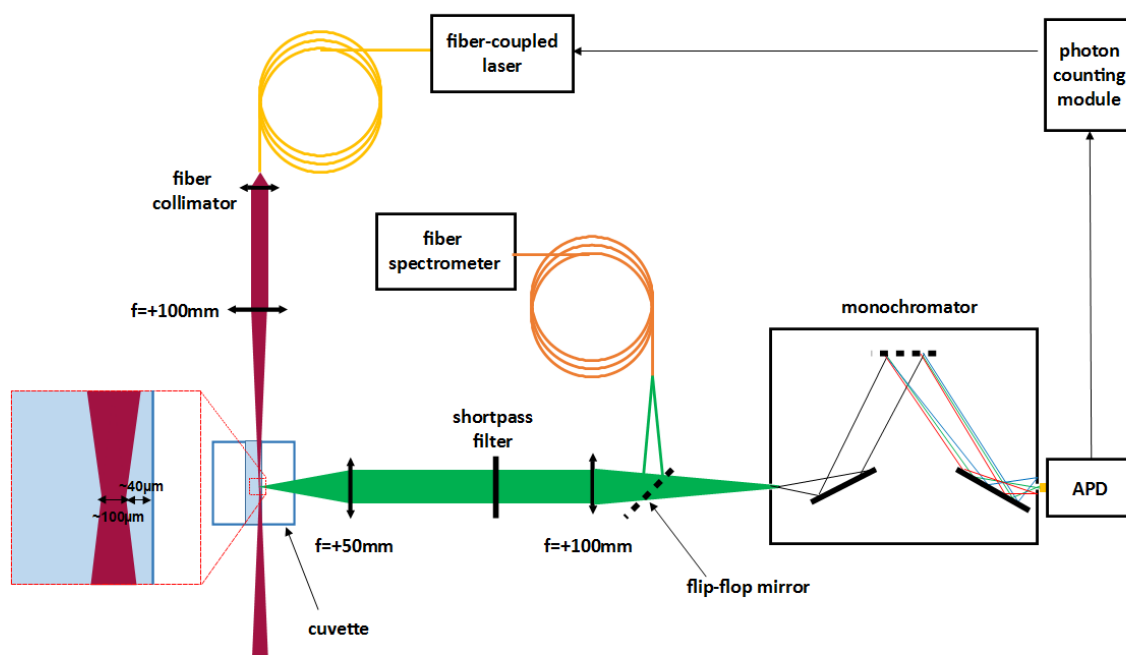

*Fig. S20. Setup scheme.*

## 9. References.

- (1) Haase, M.; Schäfer, H. Upconverting Nanoparticles. *Angew. Chem. Int. Ed.* **2011**, *50*, 5808–5829., 5808–5829.
- (2) Nguyen, T.; Francis, M. B. Practical Synthetic Route to Functionalized Rhodamine Dyes. *Org. Lett.* **2003**, *5*, 3245–3248.
- (3) Wilhelm, S.; Kaiser, M.; Würth, C.; Heiland, J.; Carrillo-Carrion, C.; Muhr, V.; Wolfbeis, O. S.; Parak, W. J.; Resch-Genger, U.; Hirsch, T. Water Dispersible Upconverting Nanoparticles: Effects of Surface Modification on Their Luminescence and Colloidal Stability. *Nanoscale* **2015**, *7*, 1403–1410.
